# Supplementary material for: Determination of nitrite ions in environment analysis with a paper-based microfluidic device
Source: Royal Society of Chemistry journal article supplement (doi:10.1039/c8dt02960a), 2018-01-01
Supplement: c8dt02960a9.pdf [file c8dt02960a9.pdf]

## **Supporting Information**

### **Determination of Nitrite Ion in environment analysis with a Paper-Based Microfluidic Device**

Yu-Ci Liu, Chia-Hui Hsu, Bing-Jyun Lu, Peng-Yi Lin and Mei-Lin Ho\*

\* Department of Chemistry, Soochow University, No 70, LinShih Rd., Shih-Lin, Taipei 11102, Taiwan. Fax: +886-2-28811053;  
Tel: +886-2-28819471 ext. 6827; E-mail: [meilin\\_ho@scu.edu.tw](mailto:meilin_ho@scu.edu.tw) (Mei-Lin Ho).

#### **Supplementary materials:**

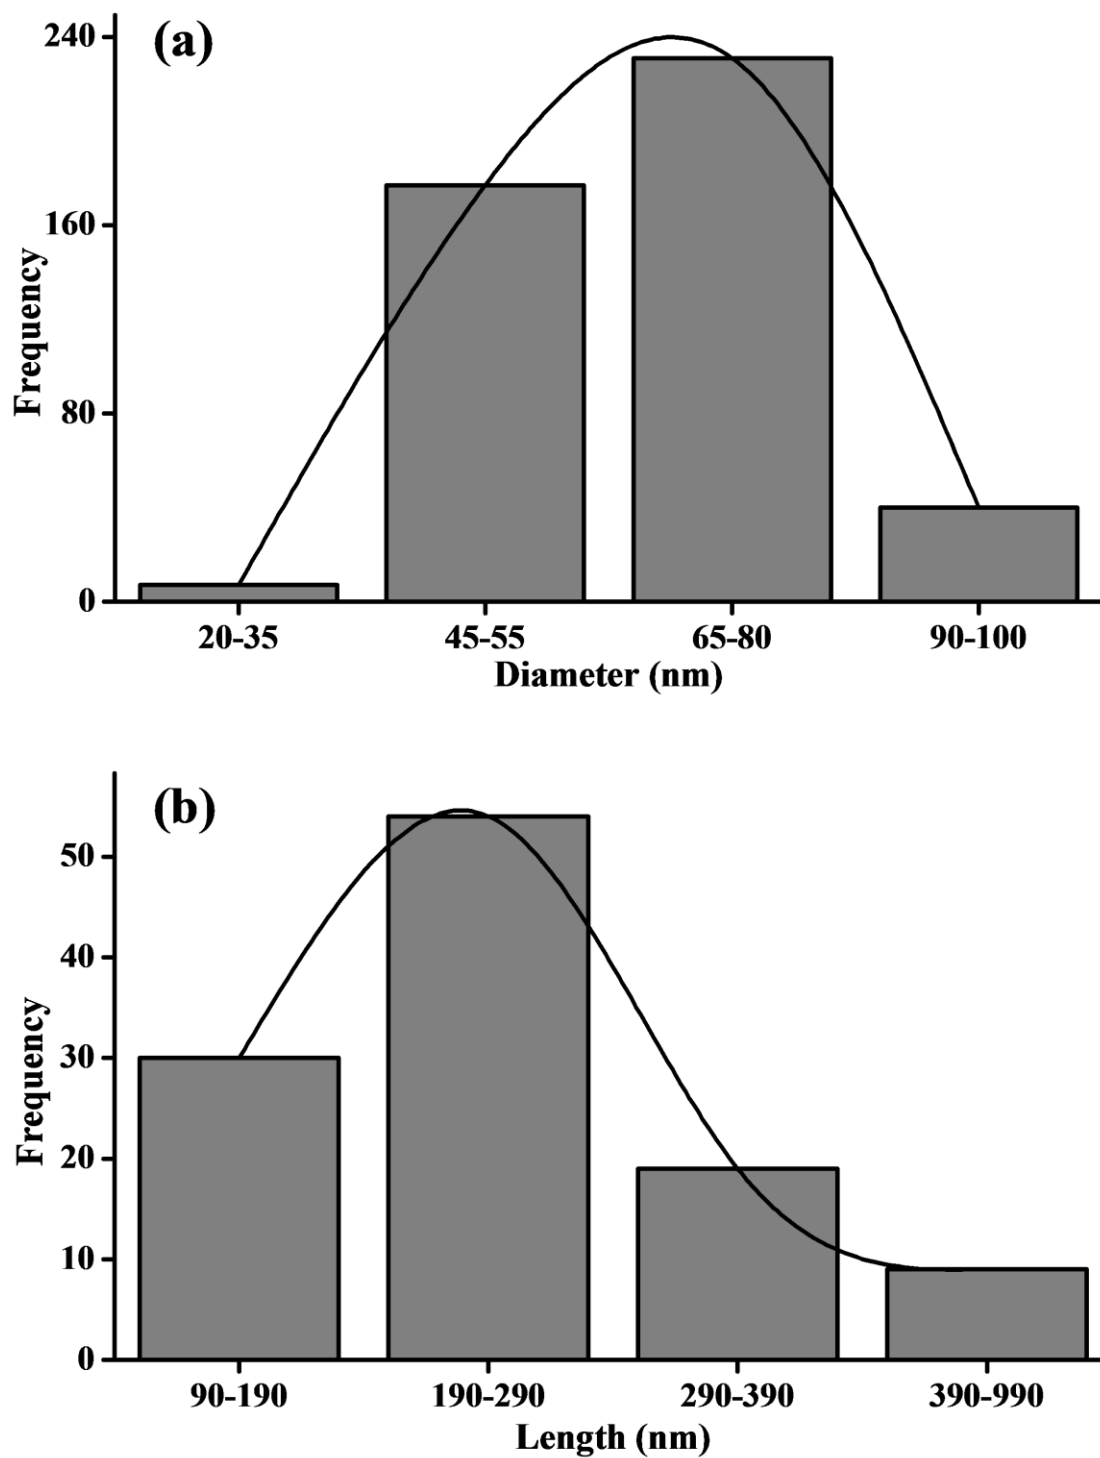

**Figure S1.** The histogram analysis of the AgNPs, including (a) AgS, and (b) AgW. Particle sizes from SEM images were measured by hand, using a ruler on printed images. A total of (a) 455, and (b) 112 particles are used in this histogram.

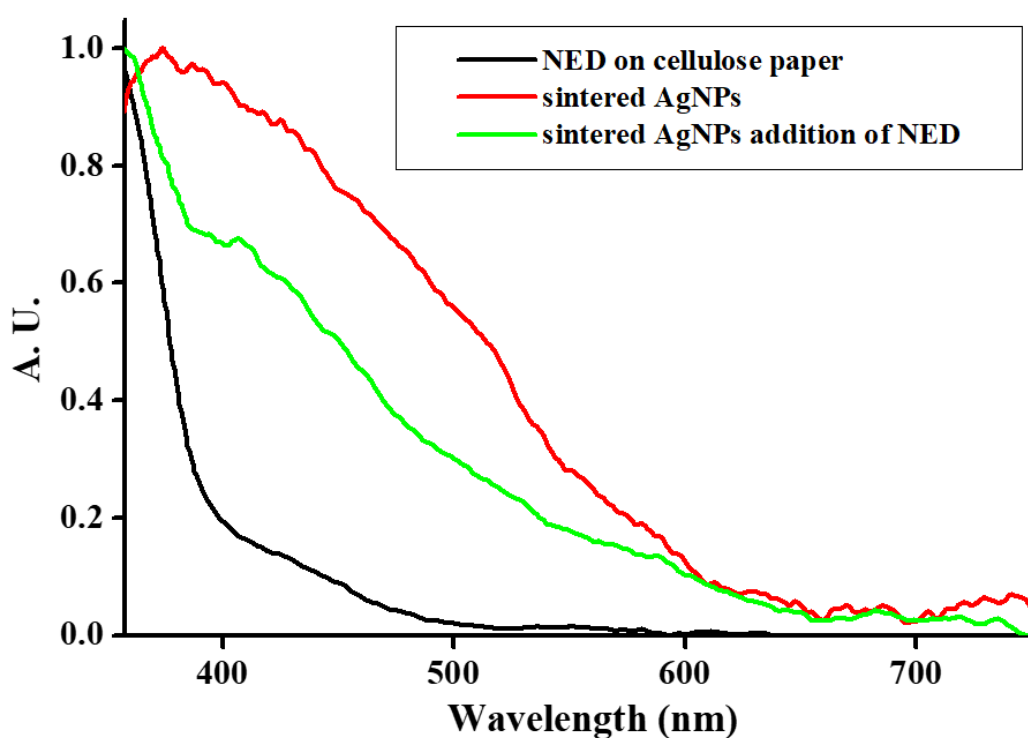

**Figure S2.** UV-vis absorption spectra of the absorption spectra of NED on cellulose paper, sintered-AgNPs, and sintered-AgNPs addition of NED. The absorption spectra of sintered AgNPs addition of NED were acquired with follow steps: the AgNPs was diluted to 50-fold first and then was sintered. The NED was added to the resulting diluted sintered hybrid AgNPs on cellulose paper, and the absorbance was measured.

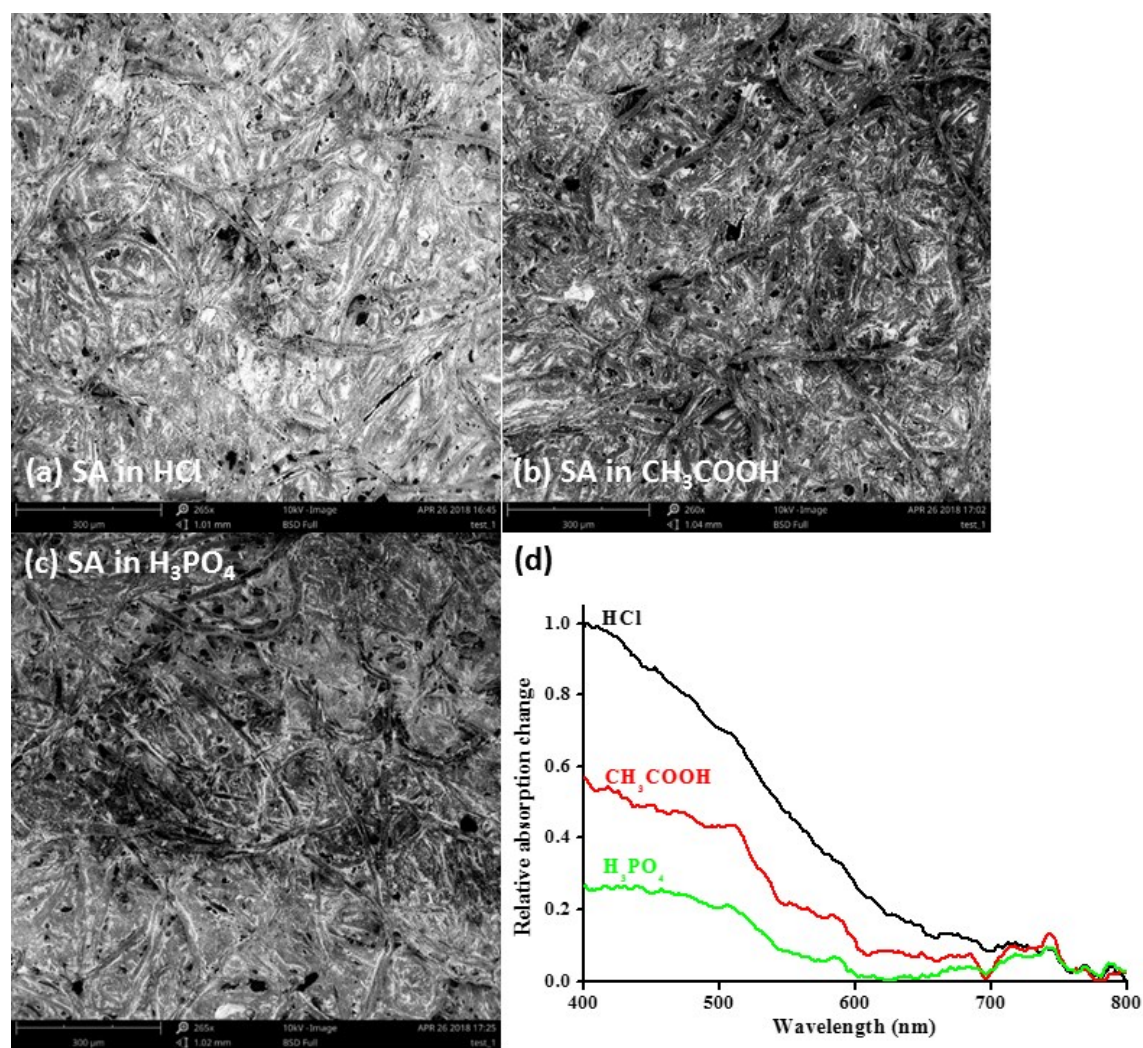

**Figure S3.** SEM images of SA in different acids (a-c). The all scale bars are 300 μm. (d) UV-vis absorption spectra of SA in different acids adding to the NED layer on the surface of Ag-μPADs.

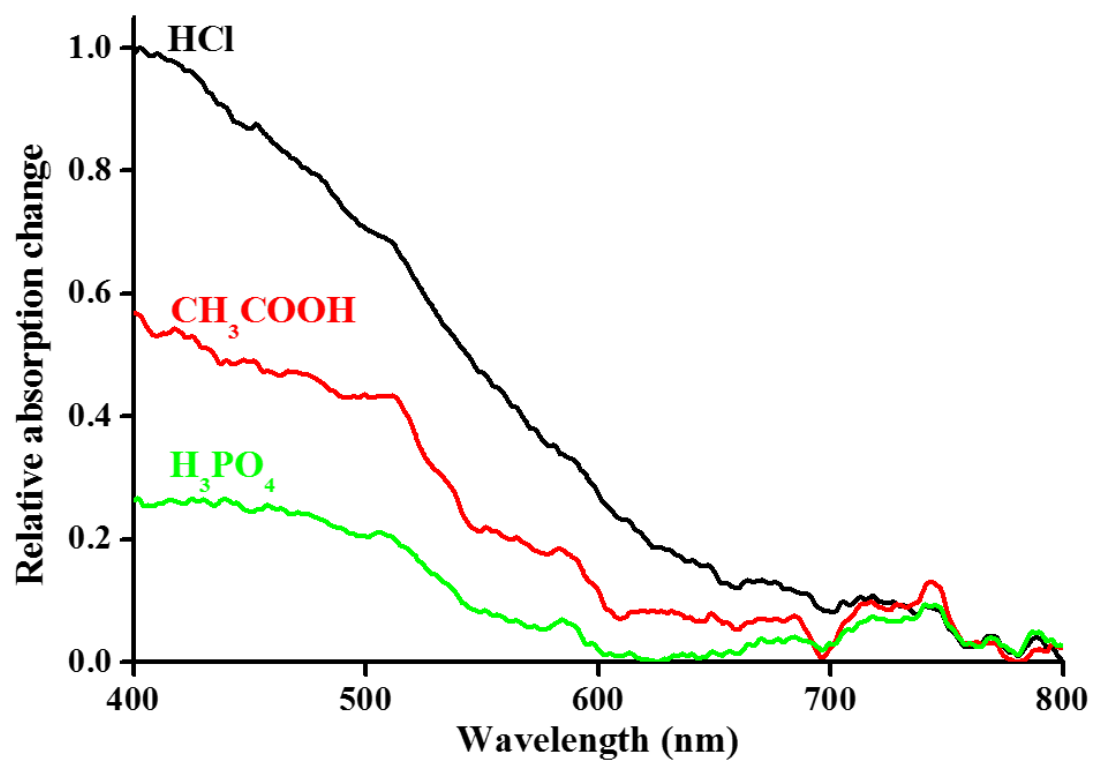

**Figure S4.** The relative absorption changes in different acids. The concentration of other compounds used in this test were 1% (w/v) of SA,  $10^{-4}$ M of the nitrite solution and 0.1% (w/v) of NED in water.

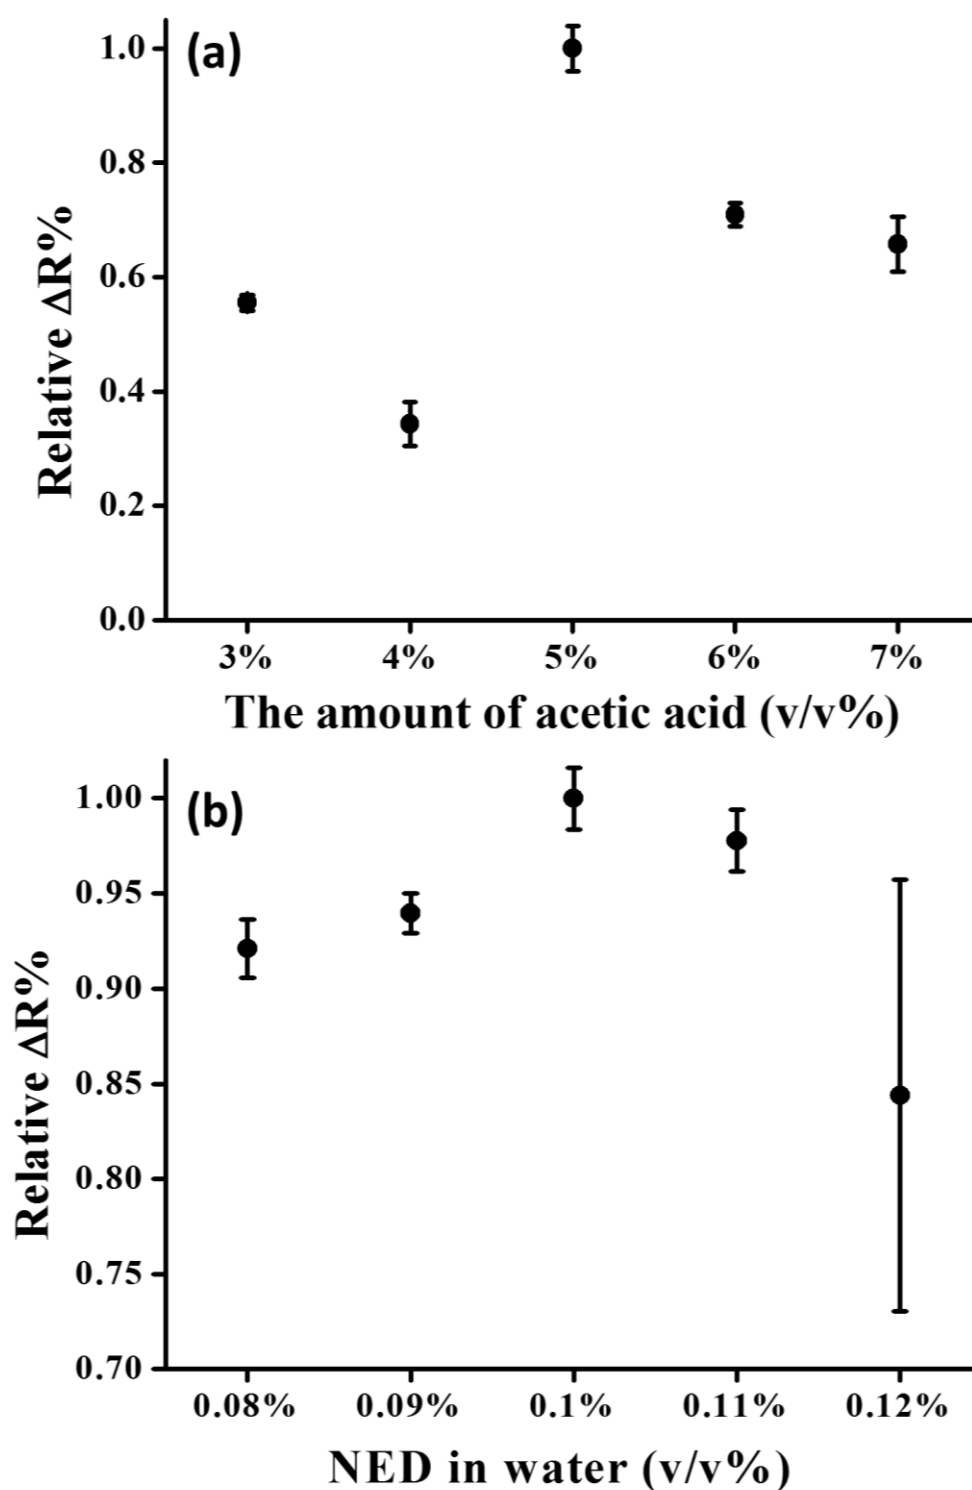

**Figure S5.** (a) The optimization concentration of acetic acid to dissolve SA (v/v%), the concentration of other compounds used in this test were 1% (w/v) of SA,  $10^{-4}$  M of the nitrite solution and 0.1% (w/v) of NED in water, and (b) the optimum amount of NED in water. Data were obtained from the average values of three replicated

measurements (N = 3).

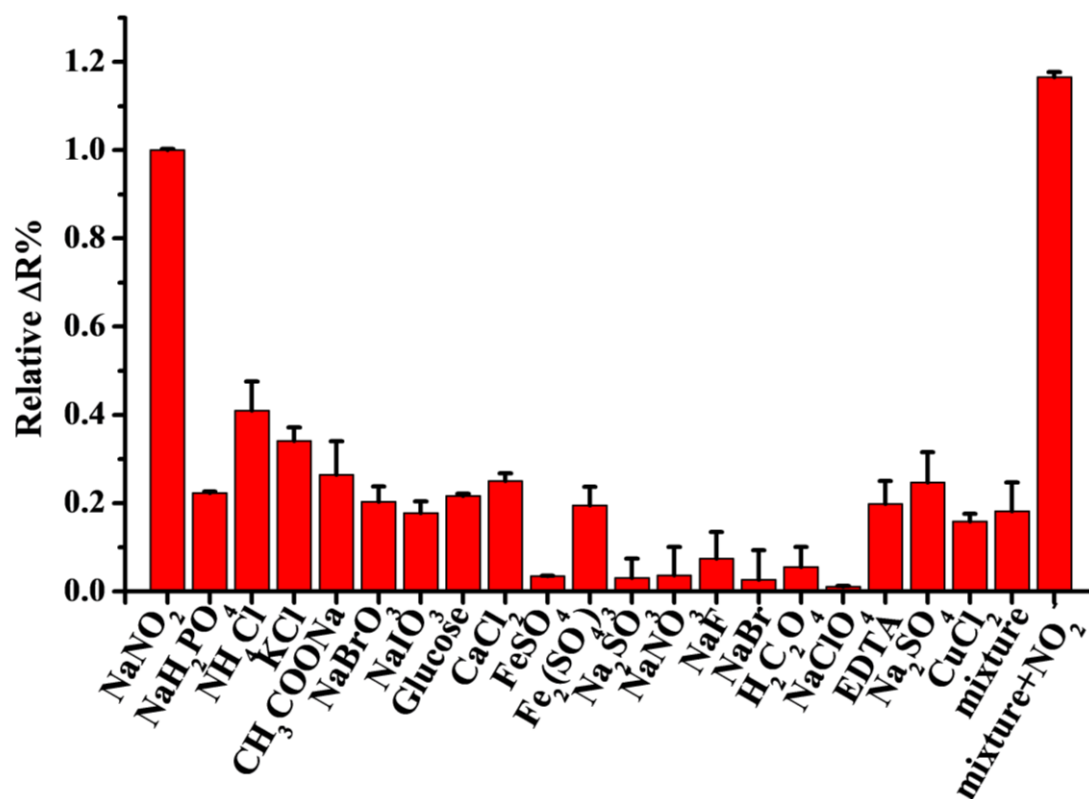

**Figure S6.** Selectivity of Ag- $\mu$ PADs toward various potential interfering anions and molecules. The mixture contained all of the interfering substances. All of the interfering substances concentrations were 100  $\mu$ M.

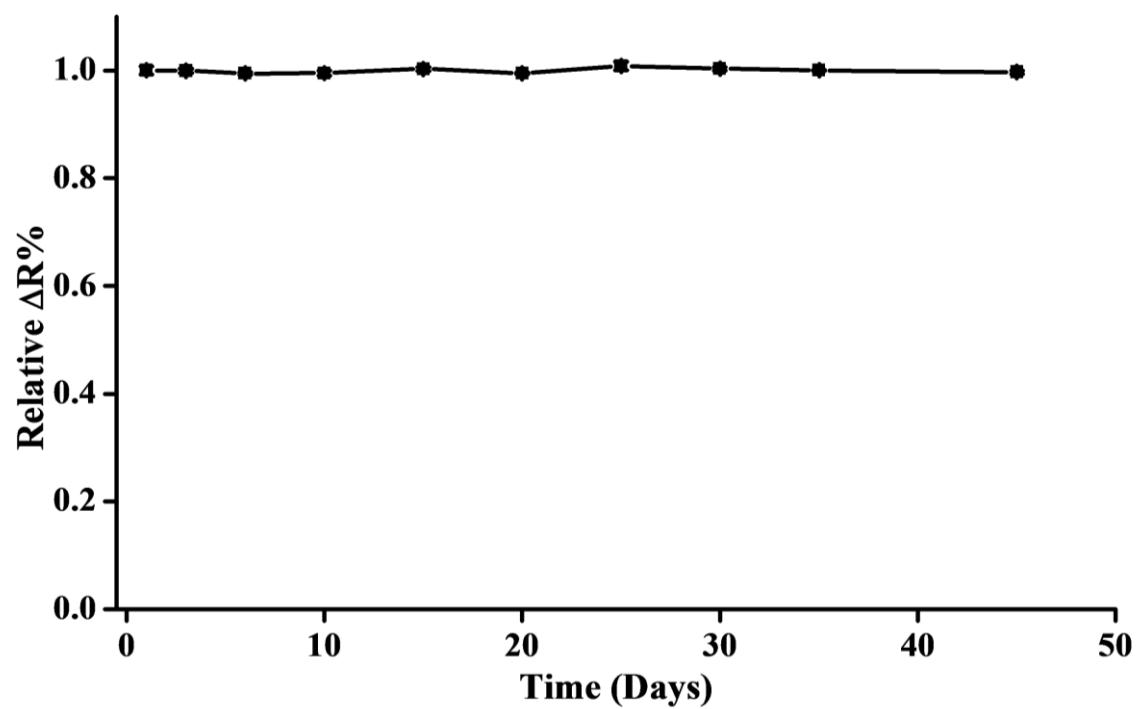

**Figure S7.** The storage stability of the Ag-μPADs for detection of 10<sup>-4</sup> M nitrite.
