# Supplementary figures and images for: Determination of nitrite ions in environment analysis with a paper-based microfluidic device
Source: Royal Society of Chemistry journal article supplement (doi:10.1039/c8dt02960a), 2018-01-01

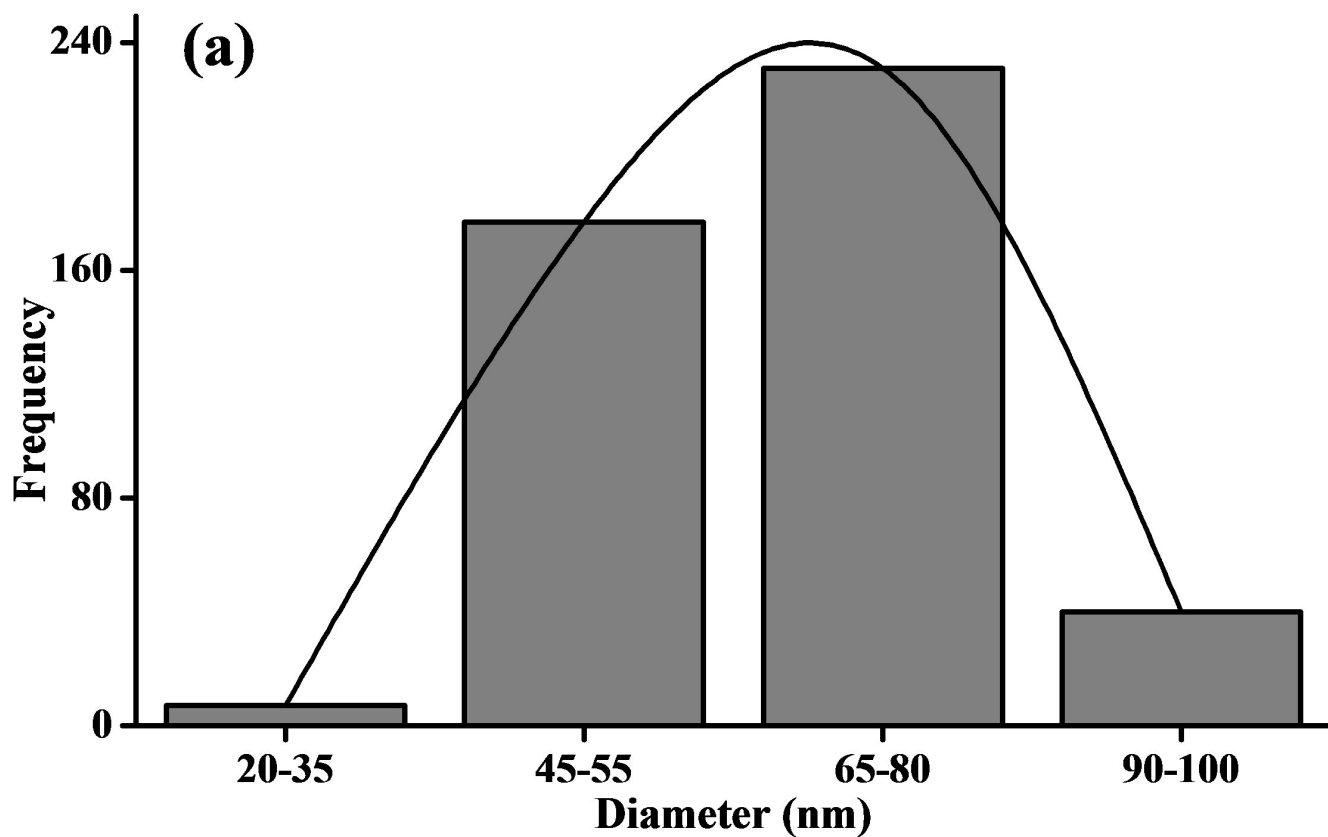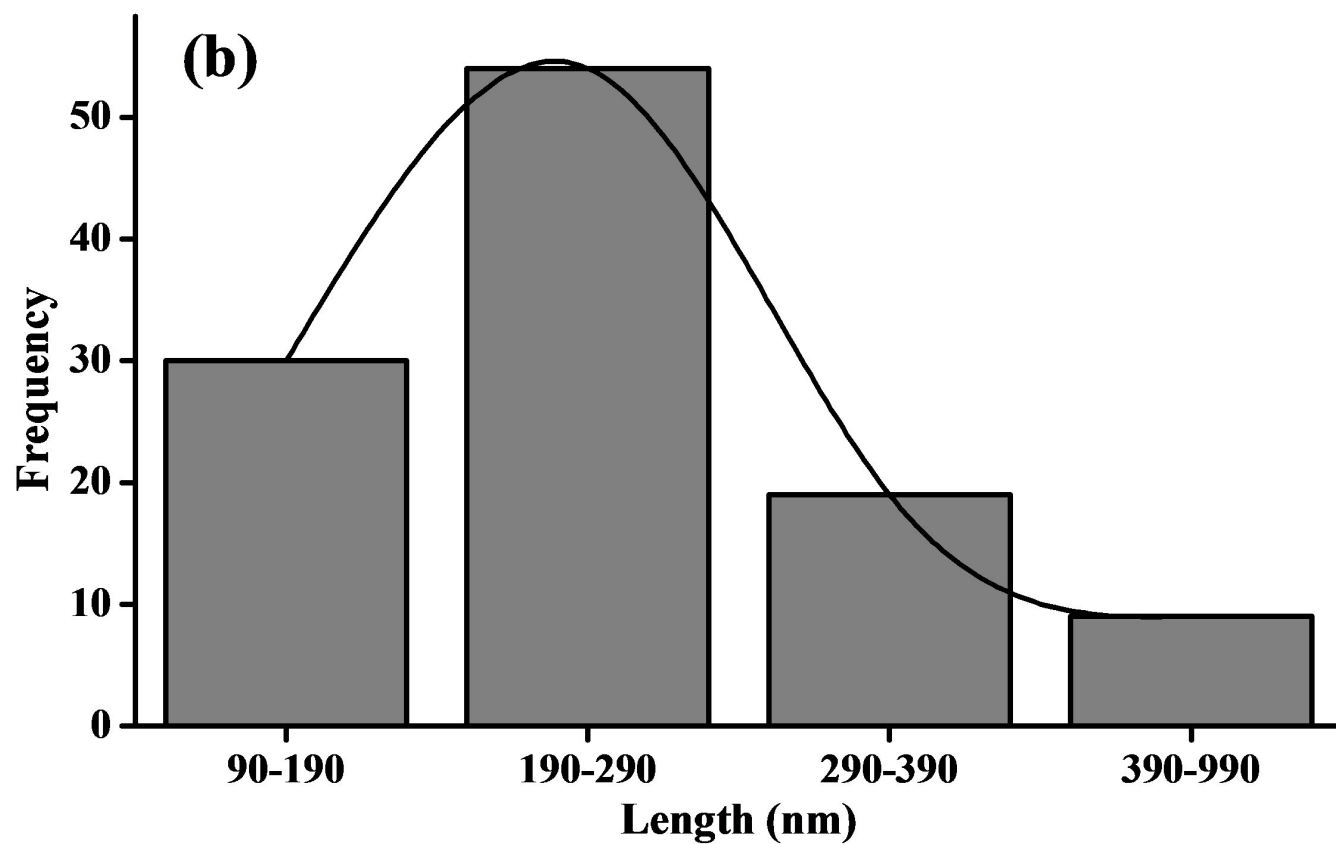

Supplement: c8dt02960a2.pdf [file c8dt02960a2.pdf]

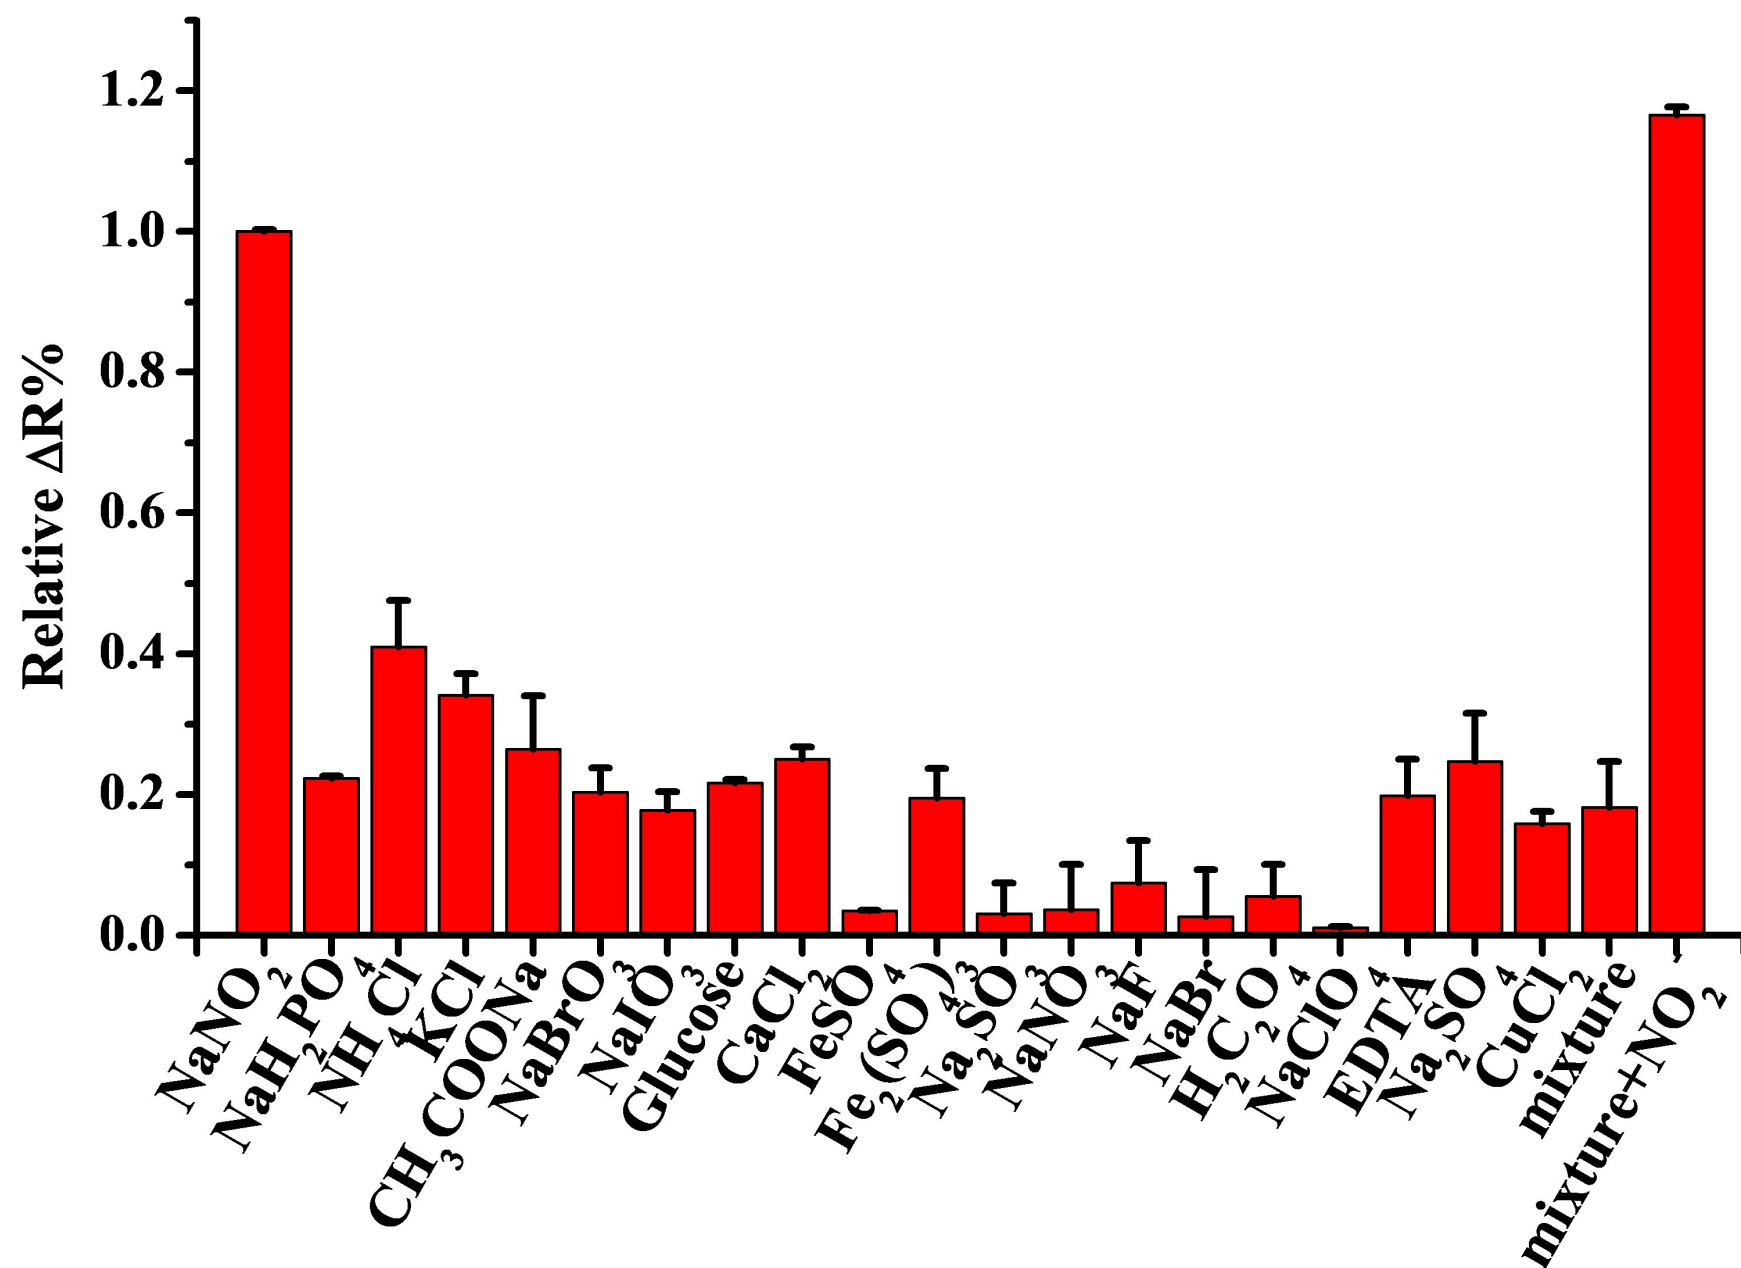

Supplement: c8dt02960a4.pdf [file c8dt02960a4.pdf]

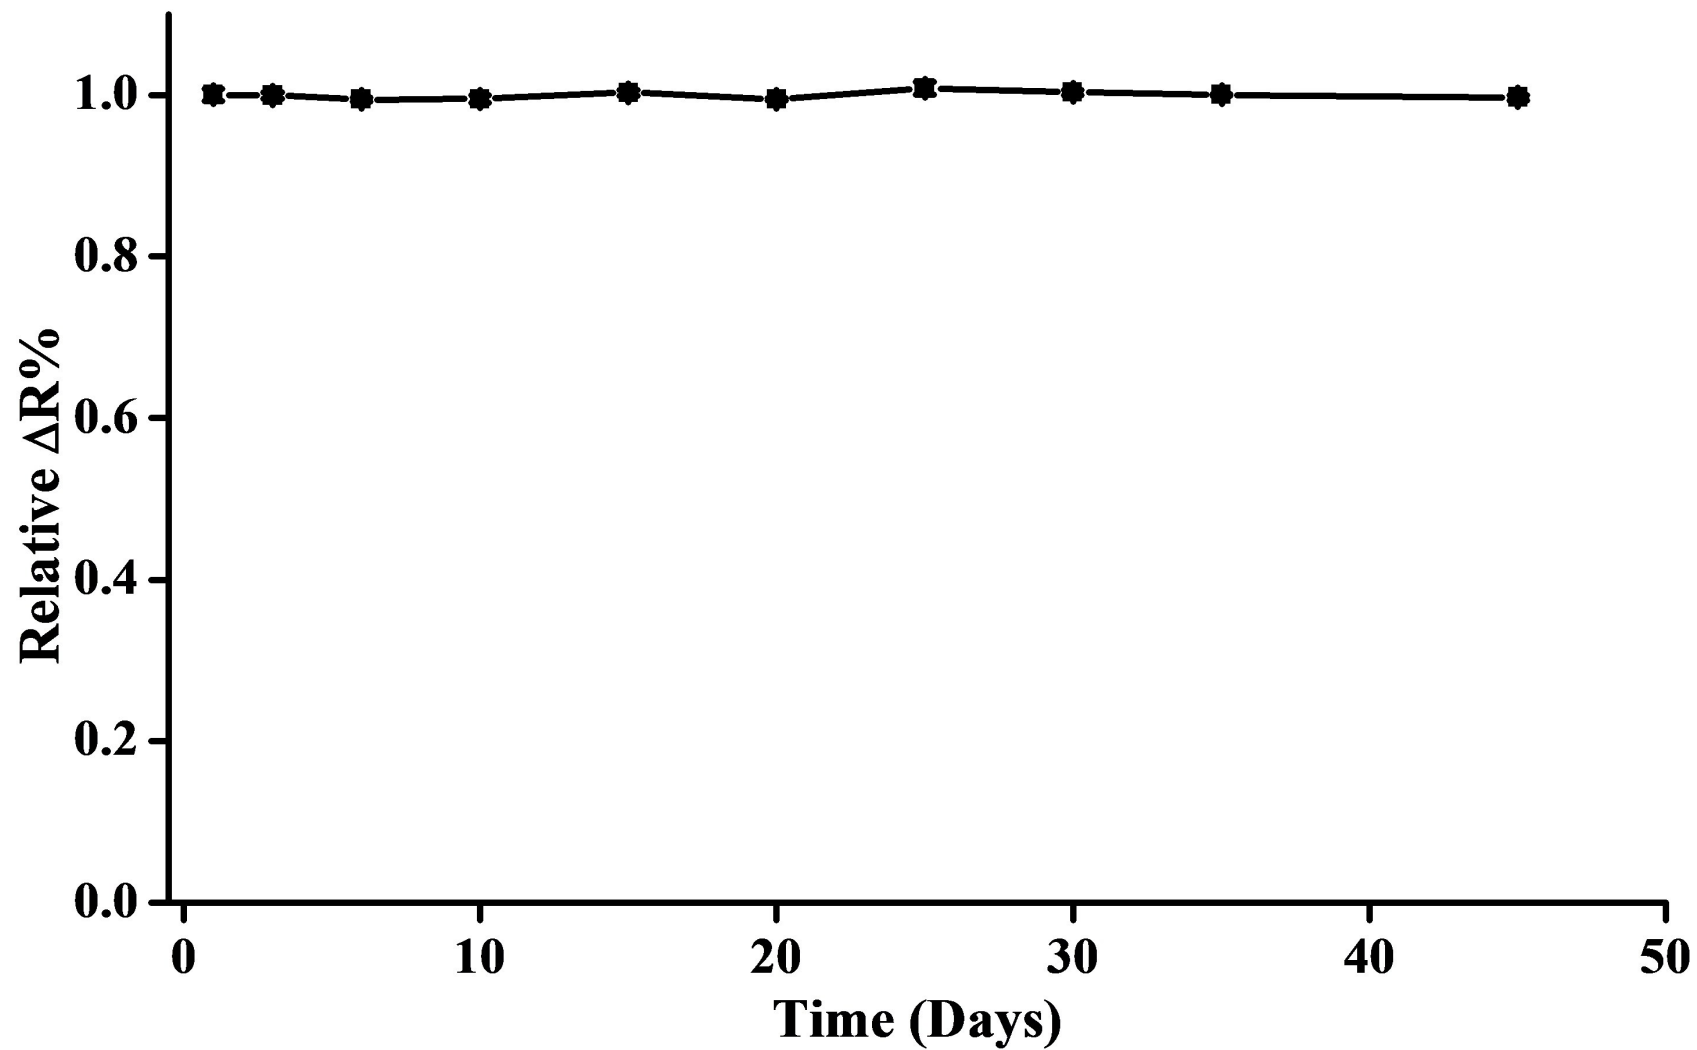

Supplement: c8dt02960a5.pdf [file c8dt02960a5.pdf]

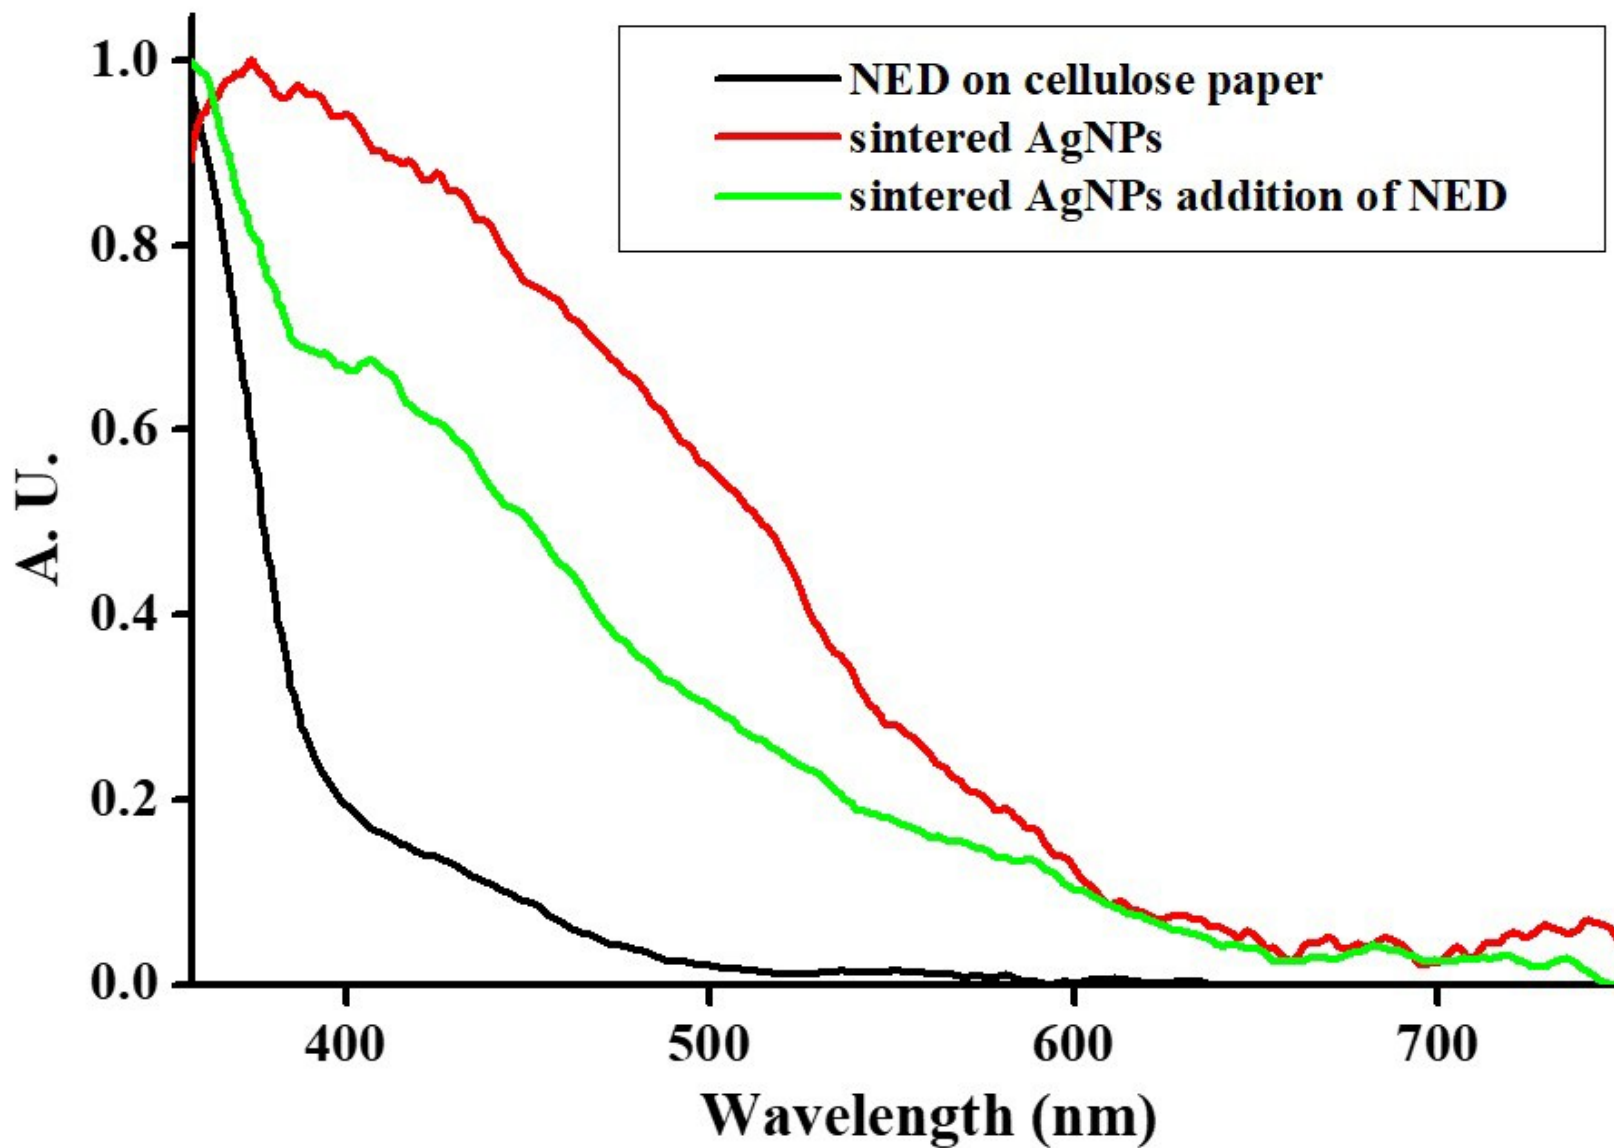

Supplement: c8dt02960a6.pdf [file c8dt02960a6.pdf]

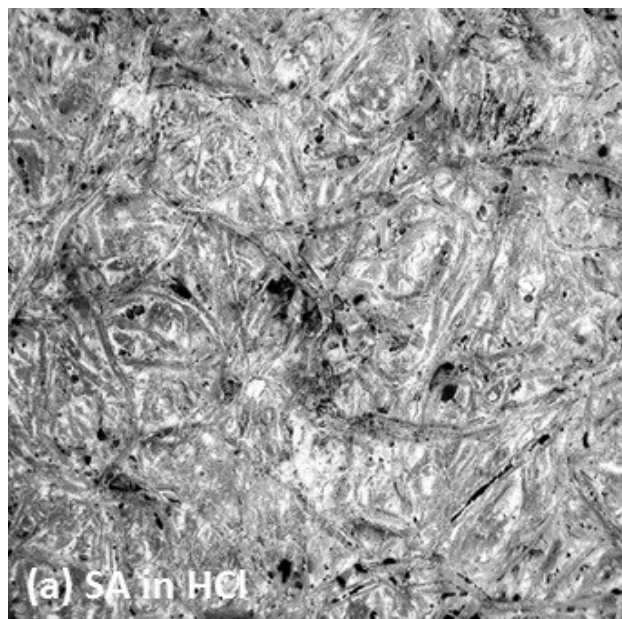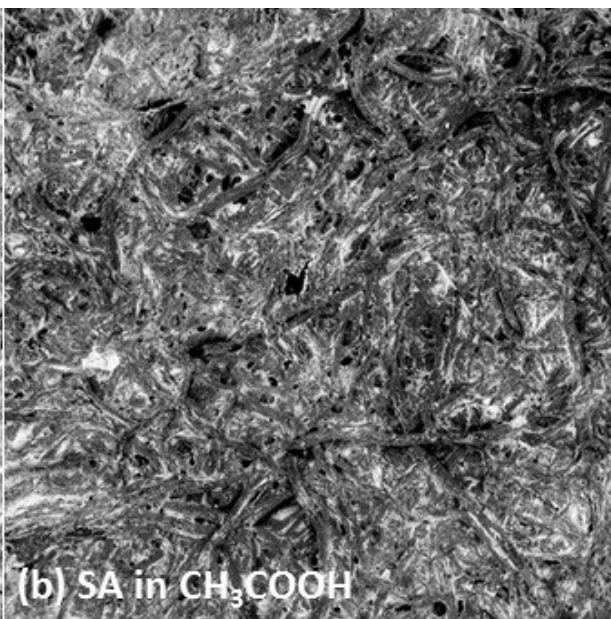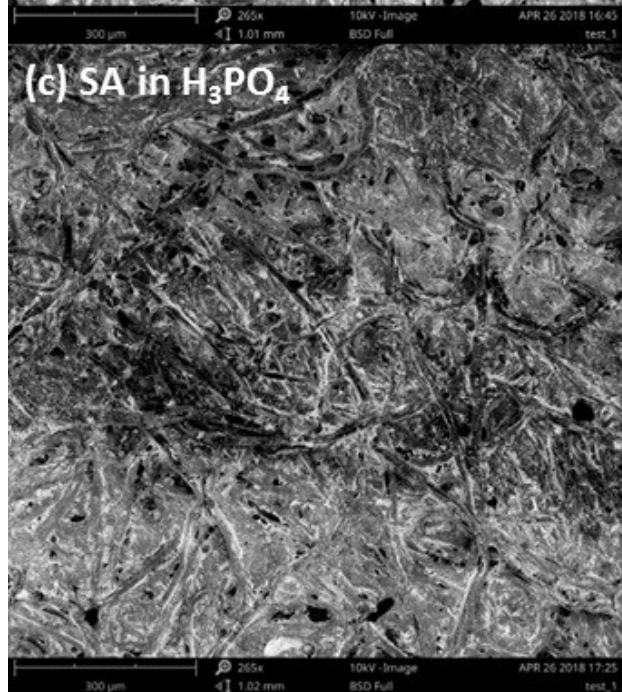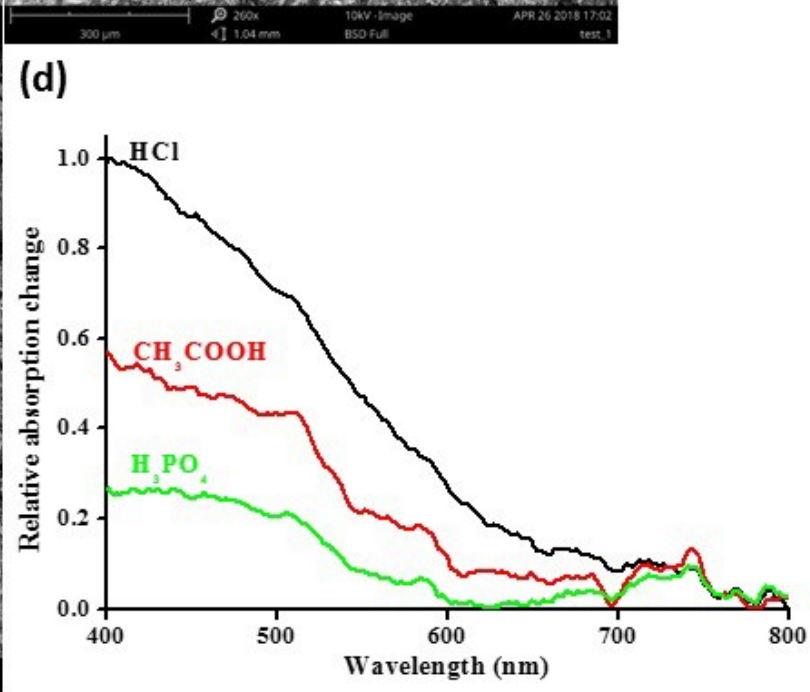

Supplement: c8dt02960a7.pdf [file c8dt02960a7.pdf]

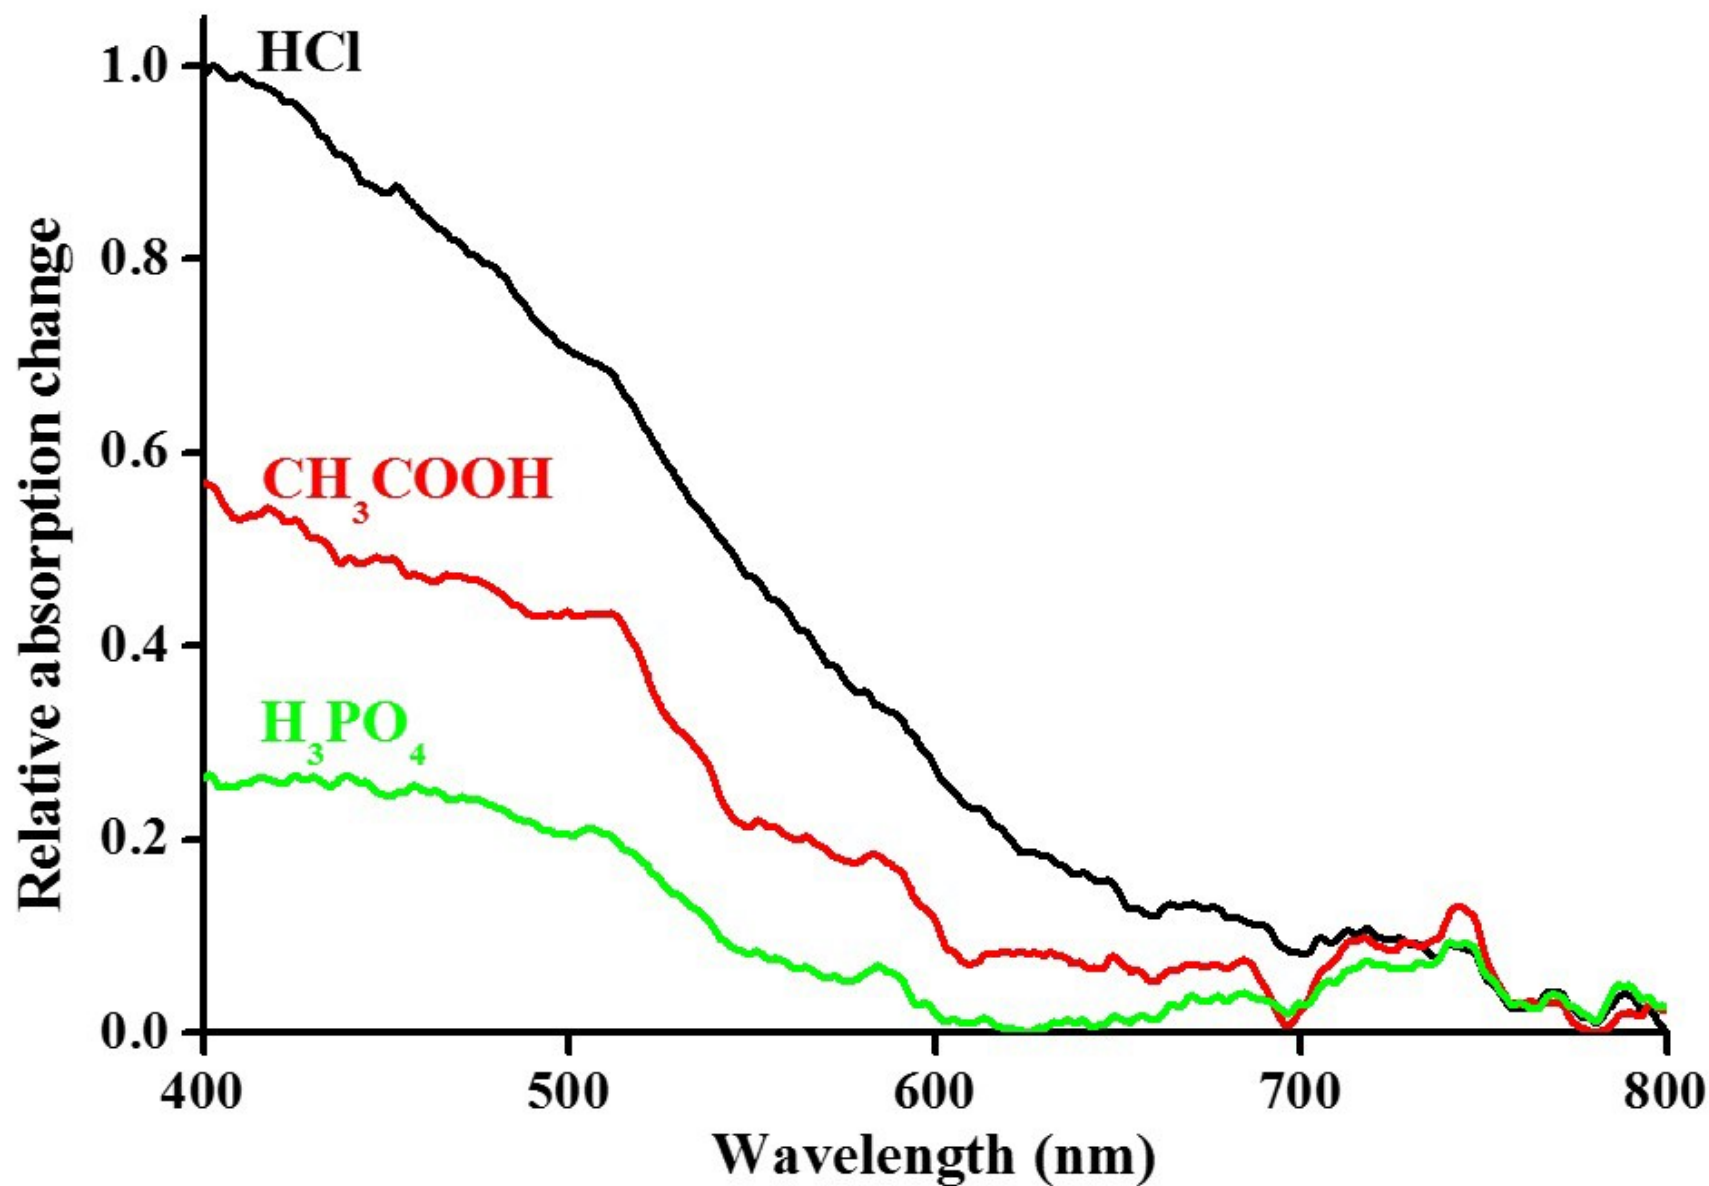

Supplement: c8dt02960a8.pdf [file c8dt02960a8.pdf]
